# Supplementary material for: Expression of Interferon Lambda 4 Is Associated with Reduced Proliferation and Increased Cell Death in Human Hepatic Cells
Source: PubMed Central journal article supplement — J Interferon Cytokine Res. 2015 Nov 1;35(11):888–900. doi: 10.1089/jir.2014.0161 (PMC4642834; doi:10.1089/jir.2014.0161), 2015-11-01
Supplement: Supp_Fig1.pdf [file Supp_Fig1.pdf]

## Supplementary Data

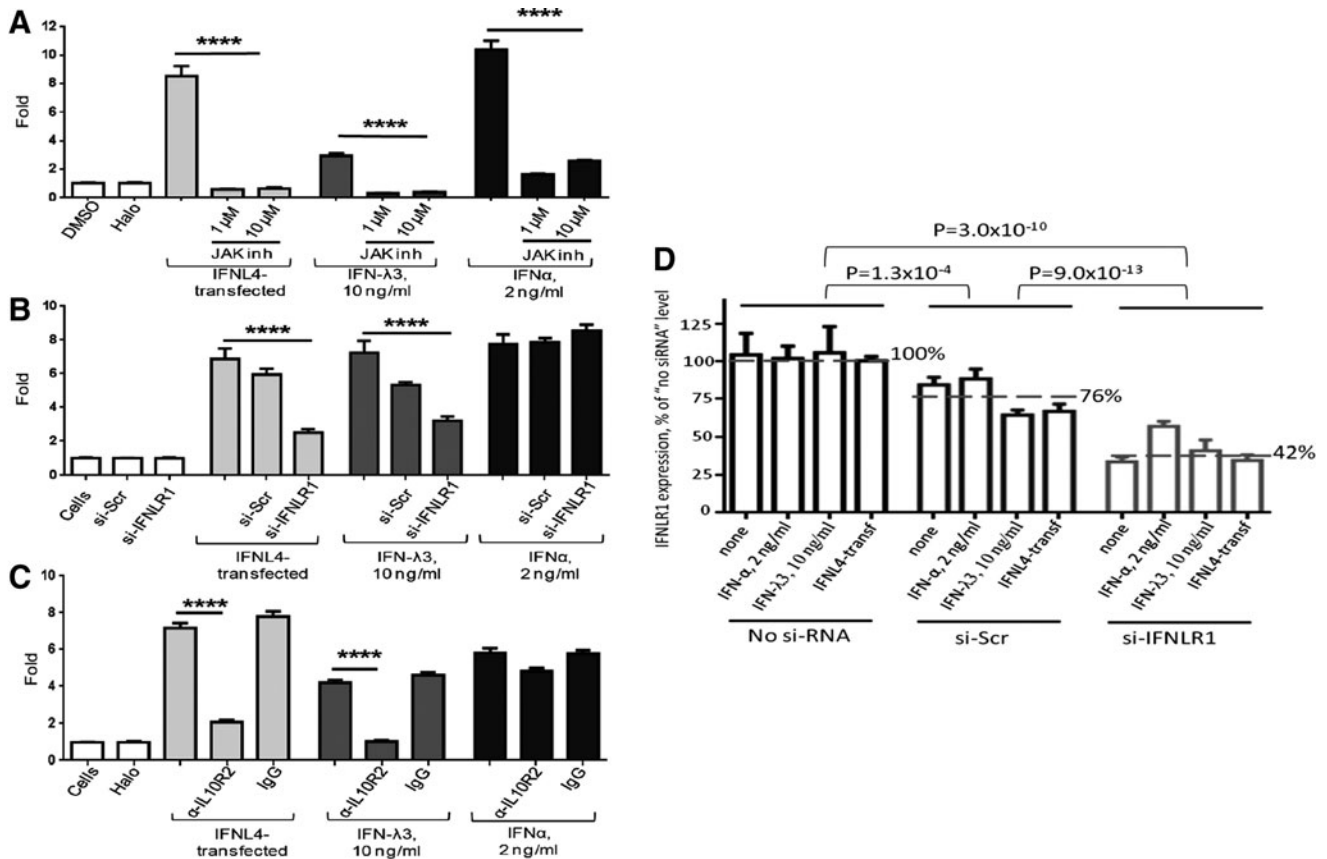

**SUPPLEMENTARY FIG. S1.** IFN- $\lambda$ 4 signals through JAK tyrosine kinases and the shared receptors of type-III interferons (IFNLR1 and IL10R2) in stable HepG2-ISRE-Luc cells. **(A)** The effects of JAK inhibitor on signaling of IFN- $\lambda$ 4 (transient transfection) or treatment with recombinant IFN- $\lambda$ 3 (10 ng/mL) or IFN- $\alpha$  (2 ng/mL), all in 8 biological replicates. Results are presented as fold change to corresponding controls—cells transfected with control-Halo or treated with 0.1% DMSO (mock). **(B)** Effects of transient siRNA knockdown of *IFNLR1* transcript on IFN- $\lambda$ 4 signaling, in siRNA untreated samples (cells) and cells treated with negative control si-Scr (scrambled siRNA) or si-*IFNLR1*, all in 6 biological replicates. After 24 h, cells were treated with IFN- $\lambda$ 3 (10 ng/mL), IFN- $\alpha$  (2 ng/mL) or mock treated. Results are presented as fold change to cells treated with scrambled siRNA (si-Scr). **(C)** Effects of treatment with a blocking  $\alpha$ -IL10R2 antibody on signaling of IFN- $\lambda$ 4 (transient transfection) or treatment by IFN- $\lambda$ 3 (10 ng/mL) or IFN- $\alpha$  (2 ng/mL). For all experiments, the cells were assayed 48 h post-transfection for expression of the ISRE-Luc reporter. \*\*\*\* $P < 0.0001$  based on *t*-tests. **(D)** Efficiency of siRNA knockdown of *IFNLR1* in samples presented on **(B)**. siRNA untreated cells and cells treated with negative control (si-Scr) and si-*IFNLR1*, all in 6 biological replicates. Analysis was performed with qRT-PCR for *IFNLR1* mRNA and normalized by *ACTB* expression in the same samples. Expression is presented as *IFNLR1* expression, in % to the level of untreated samples, taken as 100%. There was an average of 76% in the group of si-Scr samples and 42% in the group of si-*IFNLR1* samples; group means are marked by red dashed lines. Error bars represent SEM. *P* values are based on *t*-tests. DMSO, dimethyl sulfoxide; IFN- $\lambda$ 4, interferon lambda 4; ISRE, interferon-stimulated response element; qRT-PCR, quantitative reverse-transcriptase–polymerase chain reaction; SEM, standard error of the mean.
