# Supplementary material for: Expression of Interferon Lambda 4 Is Associated with Reduced Proliferation and Increased Cell Death in Human Hepatic Cells
Source: PubMed Central journal article supplement — J Interferon Cytokine Res. 2015 Nov 1;35(11):888–900. doi: 10.1089/jir.2014.0161 (PMC4642834; doi:10.1089/jir.2014.0161), 2015-11-01
Supplement: Supp_Fig2.pdf [file Supp_Fig2.pdf]

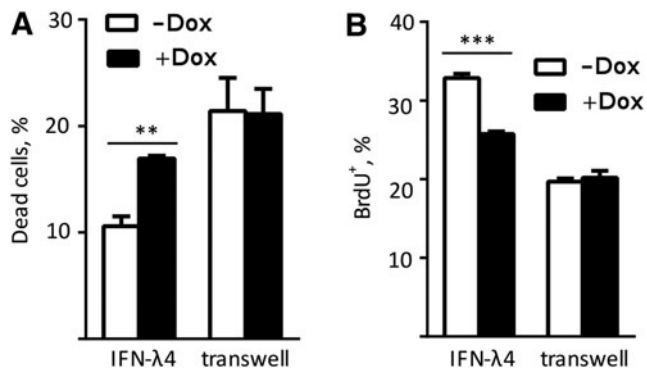

**SUPPLEMENTARY FIG. S2.** Secreted IFN-λ4 does not induce cell death or block proliferation in a transwell assay. **(A)** Expression of IFN-λ4-GFP in stable HepG2 cells was induced with 1 μg/mL doxycycline for 72 h. Transwells with untransfected cells were inserted into plates with induced HepG2 cells after first 24 h and co-incubated in shared media for 48 h. Cell viability was analyzed by multiparametric flow cytometry as % of dead cells after staining for Live/Dead and Annexin V markers. **(B)** Multiparametric flow cytometry cell proliferation analysis was performed on induced stable HepG2 that were additionally incubated with 1 μM BrdU for 3 h and stained with α-BRDU antibody. The graphs shown are representative of 2 independent experiments,  $n=3$ , error bars—SEM,  $**P<0.01$ ,  $***P<0.001$ , based on *t*-tests. BrdU, 5-bromo-2'-deoxyuridine; GFP, green fluorescent protein; SEM, standard error of the mean.
