# Supplementary material for: Expression of Interferon Lambda 4 Is Associated with Reduced Proliferation and Increased Cell Death in Human Hepatic Cells
Source: PubMed Central journal article supplement — J Interferon Cytokine Res. 2015 Nov 1;35(11):888–900. doi: 10.1089/jir.2014.0161 (PMC4642834; doi:10.1089/jir.2014.0161), 2015-11-01
Supplement: Supp_Table4.pdf [file Supp_Table4.pdf]

**Supplementary Table 4.** qRT-PCR analysis of expression of interferons in transfected or transwell PHHs (donor 2).

| Condition   | Treatment | Sample type      | B-Actin, average | B-Actin, stdev | IFNL4 region | IFNL3 | IFNG | IFNL1 | IFNA1 | IFNA2 | IFNB1 |
|-------------|-----------|------------------|------------------|----------------|--------------|-------|------|-------|-------|-------|-------|
| IFNL4.1     |           | Transfected PHHs | 29.65            | 0.68           | 25.83        | ND    | ND   | ND    | ND    | ND    | ND    |
| IFNL4.2     |           | Transfected PHHs | 28.99            | 0.56           | 25.41        | ND    | ND   | ND    | ND    | ND    | ND    |
| IFNL4.1     | Ab        | Transfected PHHs | 28.57            | 0.33           | 24.32        | ND    | ND   | ND    | ND    | ND    | ND    |
| IFNL4.2     | Ab        | Transfected PHHs | 28.90            | 0.71           | 24.88        | ND    | ND   | ND    | ND    | ND    | ND    |
| Halo.1      |           | Transfected PHHs | 26.36            | 0.55           | ND           | ND    | ND   | ND    | ND    | ND    | ND    |
| Halo.2      |           | Transfected PHHs | 27.59            | 0.53           | ND           | ND    | ND   | ND    | ND    | ND    | ND    |
| Halo.1      | Ab        | Transfected PHHs | 29.31            | 0.55           | ND           | ND    | ND   | ND    | ND    | ND    | ND    |
| Halo.2      | Ab        | Transfected PHHs | 28.38            | 0.24           | ND           | ND    | ND   | ND    | ND    | ND    | ND    |
| IFNL3.1     |           | Transfected PHHs | 27.45            | 0.31           | ND           | 24.45 | ND   | ND    | ND    | ND    | ND    |
| IFNL3.2     |           | Transfected PHHs | 27.36            | 0.27           | ND           | 24.28 | ND   | ND    | ND    | ND    | ND    |
| IFNL3.1     | Ab        | Transfected PHHs | 28.18            | 0.36           | ND           | 25.81 | ND   | ND    | ND    | ND    | ND    |
| IFNL3.2     | Ab        | Transfected PHHs | 28.12            | 0.22           | ND           | 25.88 | ND   | ND    | ND    | ND    | ND    |
| IFNL4 IgG.1 |           | Transfected PHHs | 29.95            | 0.10           | 25.48        | ND    | ND   | ND    | ND    | ND    | ND    |
| IFNL4 IgG.2 |           | Transfected PHHs | 29.62            | 0.21           | 25.49        | ND    | ND   | ND    | ND    | ND    | ND    |
| Untreated.1 |           |                  | 26.33            | 0.40           | ND           | ND    | ND   | ND    | ND    | ND    | ND    |
| Untreated.2 |           |                  | 27.56            | 0.12           | ND           | ND    | ND   | ND    | ND    | ND    | ND    |
| IFNL4.1     |           | Transwell PHHs   | 30.01            | 0.29           | ND           | ND    | ND   | ND    | ND    | ND    | ND    |
| IFNL4.2     |           | Transwell PHHs   | 29.90            | 0.13           | ND           | ND    | ND   | ND    | ND    | ND    | ND    |
| IFNL4.1     | Ab        | Transwell PHHs   | 28.92            | 0.17           | ND           | ND    | ND   | ND    | ND    | ND    | ND    |
| IFNL4.2     | Ab        | Transwell PHHs   | 31.07            | 0.29           | ND           | ND    | ND   | ND    | ND    | ND    | ND    |
| Halo.1      |           | Transwell PHHs   | 29.35            | 0.04           | ND           | ND    | ND   | ND    | ND    | ND    | ND    |
| Halo.2      |           | Transwell PHHs   | 29.99            | 0.20           | ND           | ND    | ND   | ND    | ND    | ND    | ND    |
| Halo.1      | Ab        | Transwell PHHs   | 29.69            | 0.47           | ND           | ND    | ND   | ND    | ND    | ND    | ND    |
| Halo.2      | Ab        | Transwell PHHs   | 29.01            | 0.14           | ND           | ND    | ND   | ND    | ND    | ND    | ND    |
| IFNL3.1     |           | Transwell PHHs   | 29.60            | 0.29           | ND           | ND    | ND   | ND    | ND    | ND    | ND    |
| IFNL3.2     |           | Transwell PHHs   | 29.25            | 0.16           | ND           | ND    | ND   | ND    | ND    | ND    | ND    |
| IFNL3.1     | Ab        | Transwell PHHs   | 28.55            | 0.20           | ND           | ND    | ND   | ND    | ND    | ND    | ND    |
| IFNL3.2     | Ab        | Transwell PHHs   | 29.25            | 0.21           | ND           | ND    | ND   | ND    | ND    | ND    | ND    |
| IFNL4 IgG   |           | Transwell PHHs   | 30.36            | 0.24           | ND           | ND    | ND   | ND    | ND    | ND    | ND    |
| IFNL4 IgG   |           | Transwell PHHs   | 29.41            | 0.22           | ND           | ND    | ND   | ND    | ND    | ND    | ND    |
| Untreated   |           | Transwell PHHs   | 30.43            | 0.21           | ND           | ND    | ND   | ND    | ND    | ND    | ND    |
| Untreated   |           | Transwell PHHs   | 30.76            | 0.21           | ND           | ND    | ND   | ND    | ND    | ND    | ND    |
| DNA         |           |                  | ND               |                | ND           | 27.49 | ND   | ND    | ND    | ND    | ND    |
| water       |           |                  | ND               |                | ND           | ND    | ND   | ND    | ND    | ND    | ND    |

PHHs from donor 2 were used for qRT-PCR analysis of expression. All samples are represented by biological duplicates.

All assays were performed in triplicates on DNase I - treated RNA to eliminate residual DNA, using in average 1 ng (0.2-3 ng) of total RNA per each reaction.

Numerical values represent Ct values of detection (PCR cycle at threshold), with a total run of 45 PCR cycles, Ct values are distributed on log2 scale

ND - expression is negative, with Ct>37

B-Actin - endogenous control, measured with a commercial TaqMan assay

IFNL4 region - assay measures 2 splicing forms of IFNL4, signal should be detectable both with TT and dG allele. Here, this assay detects only transfected plasmid (positive control).

IFNL3 - assay detects signal both cDNA and DNA. Here, this assay detects only transfected plasmid (positive control).

IFNL1 - measured with a commercial TaqMan assay

IFNA1, IFNA2 and IFNB1 - measured by a qRT-PCR arrays

Additional qRT-PCR expression results from PHH2 are presented in Supplementary Table 3 and protein expression results on Figure 5.
